# Supplementary material for: The impact of tumor epithelial and microenvironmental heterogeneity on treatment responses in HER2+ breast cancer
Source: PubMed Central journal article supplement (PMC8262355; doi:10.1172/jci.insight.147617), 2021-06-08
Supplement: jciinsight-6-147617-s069.pdf [file jciinsight-6-147617-s069.pdf]

**Supplemental Table 12. Antibodies used for immunostaining.**

| <b>Antibody</b>               | <b>Host species</b> | <b>Company</b> | <b>Cat. number</b> | <b>Dilution used</b> | <b>Antigen retrieval</b> | <b>Use</b> |
|-------------------------------|---------------------|----------------|--------------------|----------------------|--------------------------|------------|
| Cleaved caspase-3             | rabbit              | Cell Signaling | 9661               | 1:100                | pH6                      | IHC/IF     |
| Phospho-histone H3            | rabbit              | Abcam          | ab5176             | 2.5ug/ml             | pH6                      | IHC/IF     |
| HER2                          | mouse IgG1          | Abcam          | ab16901            | 5ug/ml               | pH6                      | IHC/IF     |
| Phospho-EGFR                  | rabbit              | Abcam          | ab40815            | 4.3ug/ml             | pH6                      | IHC/IF     |
| Estrogen receptor             | rabbit              | ThermoFisher   | RM9101S1           | 1:1000               | pH6                      | IHC/IF     |
| Anti-rabbit-AlexaFluor488     | goat                | ThermoFisher   | A11034             | 20ug/ml              |                          | IHC/IF     |
| Anti-mouse IgG1-AlexaFluor594 | goat                | ThermoFisher   | A21125             | 20ug/ml              |                          | IHC/IF     |
| $\alpha$ SMA                  | mouse               | Santa Cruz     | sc-32251           | 1:200                | pH6/pH9                  | CyCIF      |
| CD20                          | rabbit              | abcam          | ab198941           | 1:50                 | pH6/pH9                  | CyCIF      |
| CD3                           | rabbit              | abcam          | ab213608           | 1:50                 | pH6/pH9                  | CyCIF      |
| CD31                          | rabbit              | abcam          | ab218582           | 1:100                | pH6/pH9                  | CyCIF      |
| CD4                           | rabbit              | abcam          | ab196147           | 1:100                | pH6/pH9                  | CyCIF      |
| CD45                          | rabbit              | abcam          | ab214437           | 1:50                 | pH6/pH9                  | CyCIF      |
| CD68                          | mouse               | Biologend      | 916104             | 1:50                 | pH6/pH9                  | CyCIF      |
| CD8                           | mouse               | abcam          | ab213017           | 1:50                 | pH6/pH9                  | CyCIF      |
| CK14                          | mouse               | abcam          | ab212547           | 1:400                | pH6/pH9                  | CyCIF      |
| CK19                          | mouse               | Biologend      | 628502             | 1:200                | pH6/pH9                  | CyCIF      |
| CK5                           | rabbit              | Biologend      | 905501             | 1:200                | pH6/pH9                  | CyCIF      |
| CK7                           | rabbit              | abcam          | ab185048           | 1:400                | pH6/pH9                  | CyCIF      |
| CK8                           | rabbit              | abcam          | ab192467           | 1:200                | pH6/pH9                  | CyCIF      |
| Ecad                          | rabbit              | abcam          | ab201499           | 1:100                | pH6/pH9                  | CyCIF      |
| ER                            | rabbit              | abcam          | ab205851           | 1:100                | pH6/pH9                  | CyCIF      |
| FoxP3                         | mouse               | Biologend      | 320102             | 1:50                 | pH6/pH9                  | CyCIF      |
| GRNZB                         | rabbit              | abcam          | ab219803           | 1:100                | pH6/pH9                  | CyCIF      |
| HER2                          | mouse               | Santa Cruz     | sc-33684           | 1:50                 | pH6/pH9                  | CyCIF      |
| Ki67                          | rabbit              | Cell Signaling | 12075              | 1:400                | pH6/pH9                  | CyCIF      |
| PD1                           | rabbit              | abcam          | ab201825           | 1:50                 | pH6/pH9                  | CyCIF      |
| PDPN                          | mouse               | Biologend      | 916606             | 1:50                 | pH6/pH9                  | CyCIF      |
| Vimentin                      | rabbit              | Cell Signaling | 9854               | 1:400                | pH6/pH9                  | CyCIF      |
