# Supplementary material for: The impact of tumor epithelial and microenvironmental heterogeneity on treatment responses in HER2+ breast cancer
Source: PubMed Central journal article supplement (PMC8262355; doi:10.1172/jci.insight.147617), 2021-06-08
Supplement: jciinsight-6-147617-s071.pdf [file jciinsight-6-147617-s071.pdf]

**Supplemental Table 3.** Cyclic immunofluorescence (CyCIF) gating strategy. Combinations of markers related to specific cell types were used to assign individual cells to a particular cell type.

| <b>CELL TYPE</b>   | <b>GATING</b>                                                                    |
|--------------------|----------------------------------------------------------------------------------|
| <b>Tumor</b>       | <b>CD31-, any cytokeratin+</b>                                                   |
| Luminal tumor      | CK19, CK7 or CK8 +                                                               |
| Basal Tumor        | CK5 or CK14 +                                                                    |
| Mesenchymal Tumor  | Vimentin+, cytokeratin +                                                         |
| <b>Immune</b>      | <b>CD31- and cytokeratin-; CD45, CD68, CD3 or CD4+</b>                           |
| Macrophage         | CD68+, CD31-, cytokeratin- (+/- GRNZB and PD1)                                   |
| B cell             | CD20+, CD45+, CD68-, CD31-, cytokeratin-                                         |
| CD8 T cell         | CD8+, CD45 or CD3+, CD20-, CD68-, CD31-, cytokeratin- (+/- GRNZB, PD1 and FoxP3) |
| CD4 T cell         | CD4+, CD8-, CD20-, CD68-, CD31-, cytokeratin- (+/- GRNZB, PD1 and FoxP3)         |
| <b>Endothelial</b> | <b>CD31+</b>                                                                     |
| <b>Stromal</b>     | <b>CD31-, cytokeratin-, CD45-, CD3-, CD4-, CD68-</b>                             |
| Stromal cell types | Defined above, (+/- $\alpha$ SMA, Vimentin, Podoplanin)                          |
| Proliferation      | Ki67+                                                                            |
